# Supplementary material for: Microbial biomarker detection in shrimp larvae rearing water as putative bio-surveillance proxies in shrimp aquaculture
Source: PeerJ journal article supplement (doi:10.7717/peerj.15201), 2023-05-16

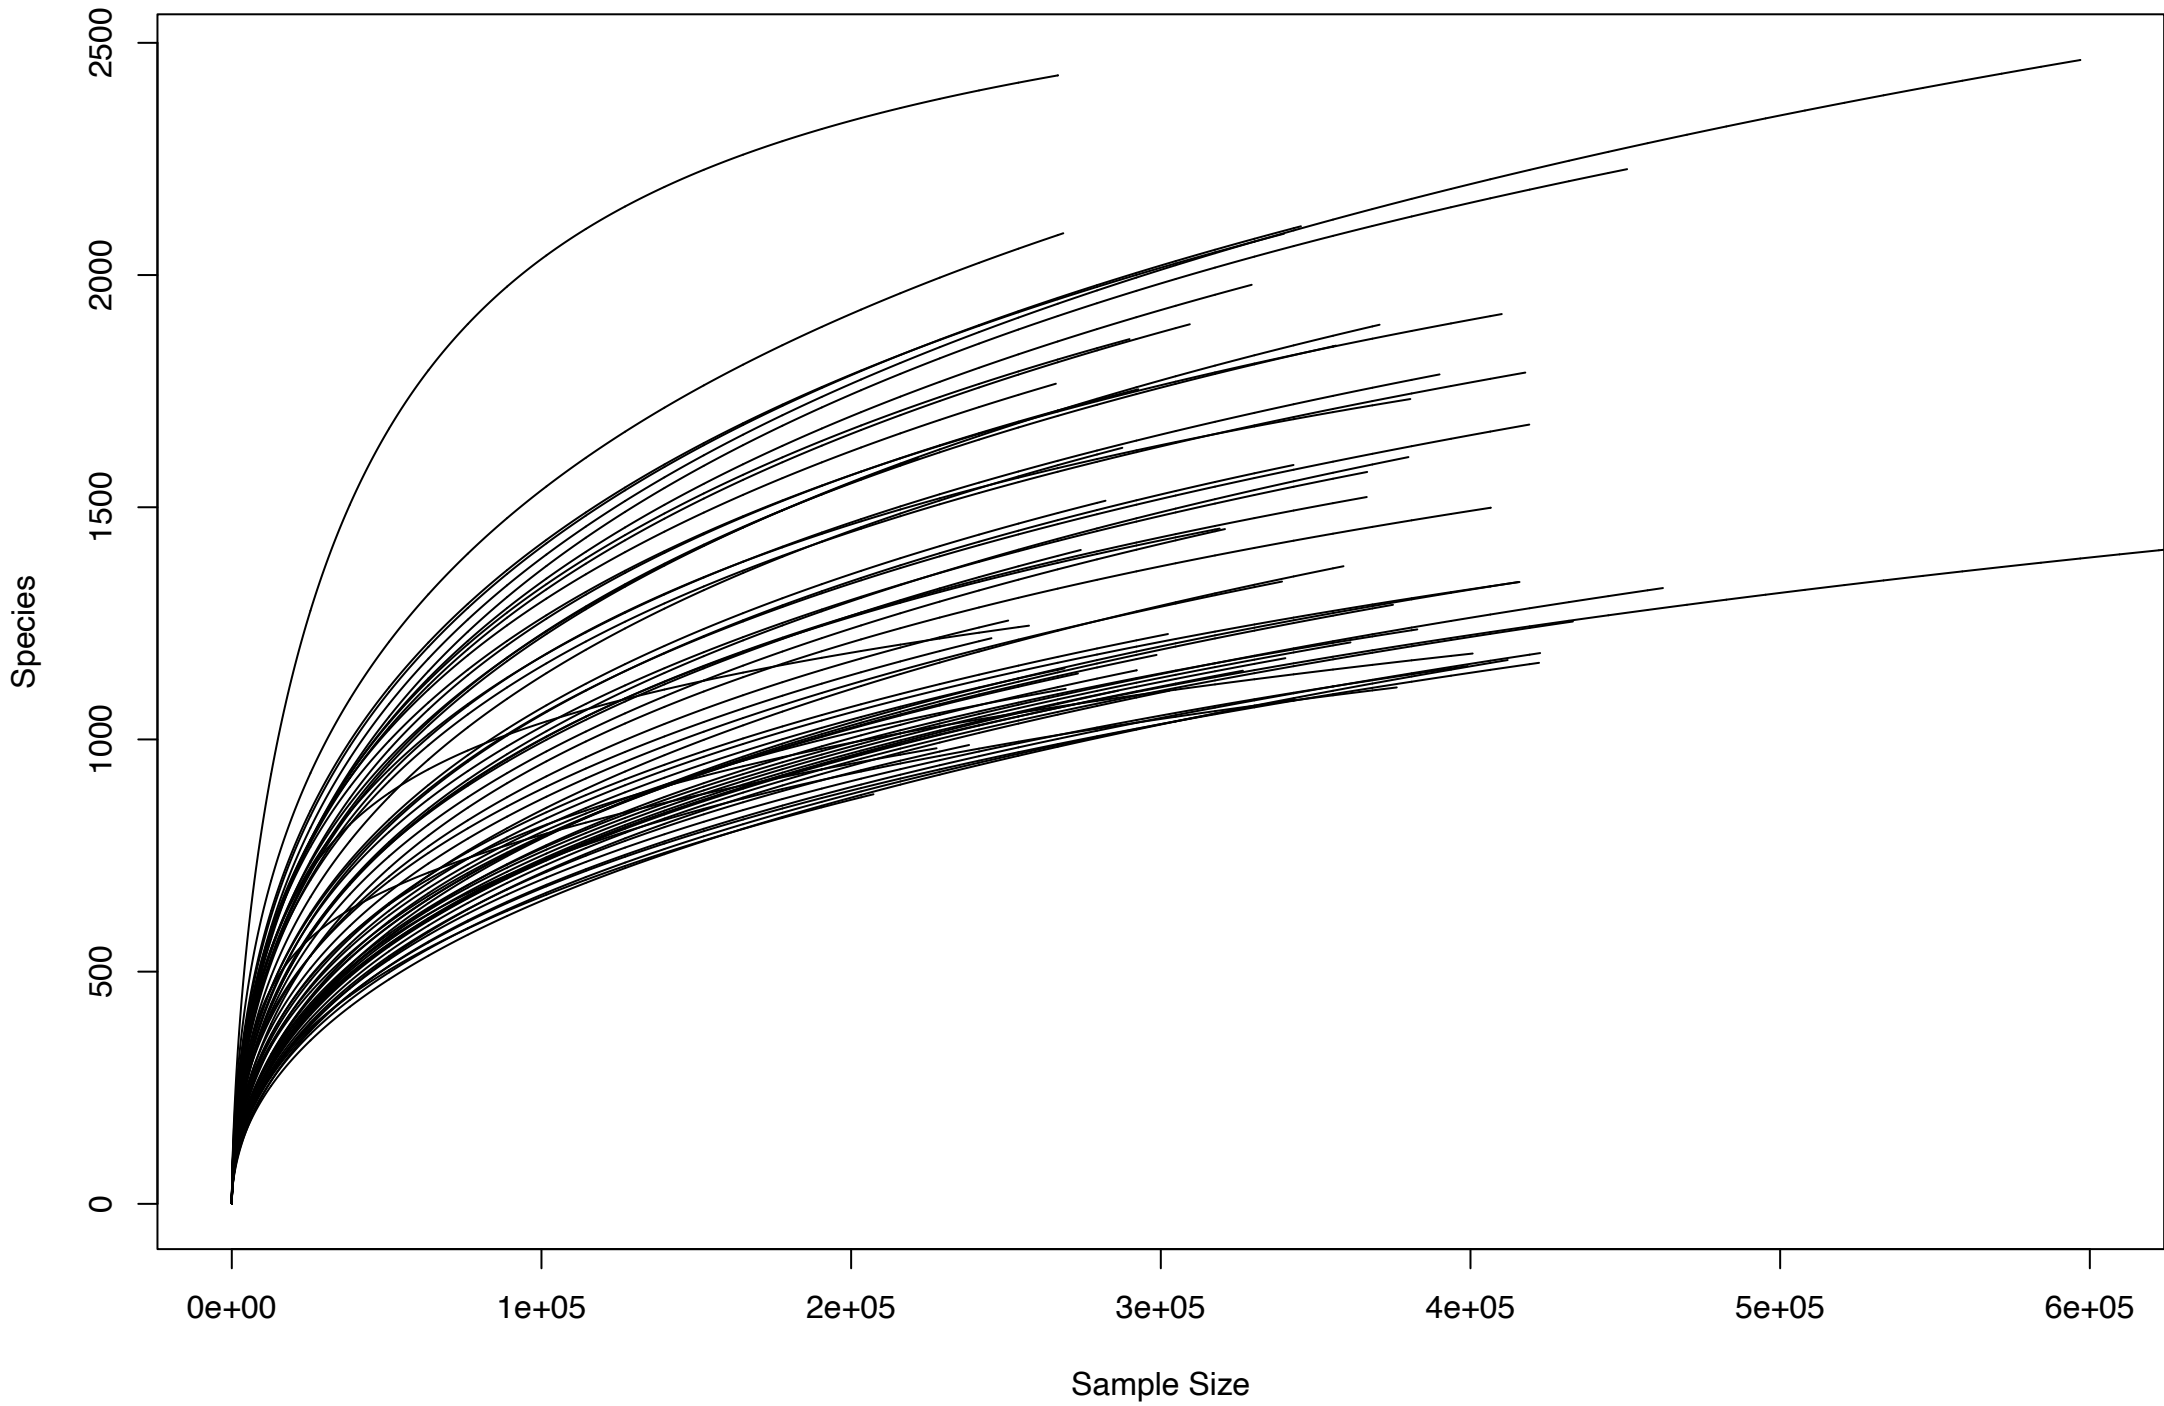

Supplement: FigureS1.pdf [file FigureS1.pdf]
