# Supplementary material for: Microbial biomarker detection in shrimp larvae rearing water as putative bio-surveillance proxies in shrimp aquaculture
Source: PeerJ. 2023 May 16;11:e15201. doi: 10.7717/peerj.15201 (PMC10198154; doi:10.7717/peerj.15201)
Supplement: Supplemental Information 2 [file peerj-11-15201-s002.xlsx]

## Sheet: Sheet1
Raw data: Larval survival for each rearing day in each tank, corresponding to the number of larvae counted in 1 liter of rearing water
	D0	D1	D2	D3	D4	D5	D6	D7	D8	D9
Without antibiotic tank A	180	180	174.75	156.25	134.75	99	64	40.75	31	0
Without antibiotic tank B	180	180	175.75	164.75	134.75	102.25	64.75	33.75	21.6667	0
Without antibiotic tank C	180	180	176.5	167.25	156.5	128.25	88.25	59	38.6667	0
With antibiotic tank A	180	180	180	175	162.5	156.5	138	138	138	132
With antibiotic tank B	180	180	166.25	167.75	167	159.5	145.5	136.5	127.25	131
With antibiotic tank C	180	180	175.75	174.75	182.25	176.25	153	139.75	128	132
Larval Survival rate in percent
	D0	D1	D2	D3	D4	D5	D6	D7	D8	D9
Without antibiotic tank A	100	100	97.0833	86.8056	74.8611	55	35.5556	22.6389	17.2222	0
Without antibiotic tank B	100	100	97.6389	91.5278	74.8611	56.8056	35.9722	18.75	12.037	0
Without antibiotic tank C	100	100	98.0556	92.9167	86.9444	71.25	49.0278	32.7778	21.4815	0
With antibiotic tank A	100	100	100	97.2222	90.2778	86.9444	76.6667	76.6667	76.6667	73.3333
With antibiotic tank B	100	100	92.3611	93.1944	92.7778	88.6111	80.8333	75.8333	70.6944	72.7778
With antibiotic tank C	100	100	97.6389	97.0833	101.25	97.9167	85	77.6389	71.1111	73.3333
