# Supplementary material for: Microbial biomarker detection in shrimp larvae rearing water as putative bio-surveillance proxies in shrimp aquaculture
Source: PeerJ. 2023 May 16;11:e15201. doi: 10.7717/peerj.15201 (PMC10198154; doi:10.7717/peerj.15201)
Supplement: Supplemental Information 3 [file peerj-11-15201-s003.xlsx]

## Sheet: Sheet1
accession	study	object_status	bioproject_accession	biosample_accession	library_ID	title	library_strategy	library_source	library_selection	library_layout	platform	instrument_model	design_description	filetype	filename	filename2
SRR21748200	SRP324193	new	PRJNA736535	SAMN31027695	M4_NT_Ctrl_J0	Control_D0	AMPLICON	METAGENOMIC	RT-PCR	paired	ILLUMINA	Illumina HiSeq 2500	V4 region 16S rRNA sequencing	fastq	M4_NT_Ctrl_J0_R1.fastq	M4_NT_Ctrl_J0_R2.fastq
SRR21748199	SRP324193	new	PRJNA736535	SAMN31027696	M4_NT_Ctrl_J1	Control_D1	AMPLICON	METAGENOMIC	RT-PCR	paired	ILLUMINA	Illumina HiSeq 2500	V4 region 16S rRNA sequencing	fastq	M4_NT_Ctrl_J1_R1.fastq	M4_NT_Ctrl_J1_R2.fastq
SRR21748188	SRP324193	new	PRJNA736535	SAMN31027697	M4_NT_Ctrl_J2	Control_D2	AMPLICON	METAGENOMIC	RT-PCR	paired	ILLUMINA	Illumina HiSeq 2500	V4 region 16S rRNA sequencing	fastq	M4_NT_Ctrl_J2_R1.fastq	M4_NT_Ctrl_J2_R2.fastq
SRR21748177	SRP324193	new	PRJNA736535	SAMN31027698	M4_NT_Ctrl_J3	Control_D3	AMPLICON	METAGENOMIC	RT-PCR	paired	ILLUMINA	Illumina HiSeq 2500	V4 region 16S rRNA sequencing	fastq	M4_NT_Ctrl_J3_R1.fastq	M4_NT_Ctrl_J3_R2.fastq
SRR21748166	SRP324193	new	PRJNA736535	SAMN31027699	M4_NT_Ctrl_J4	Control_D4	AMPLICON	METAGENOMIC	RT-PCR	paired	ILLUMINA	Illumina HiSeq 2500	V4 region 16S rRNA sequencing	fastq	M4_NT_Ctrl_J4_R1.fastq	M4_NT_Ctrl_J4_R2.fastq
SRR21748155	SRP324193	new	PRJNA736535	SAMN31027700	M4_NT_Ctrl_J5	Control_D5	AMPLICON	METAGENOMIC	RT-PCR	paired	ILLUMINA	Illumina HiSeq 2500	V4 region 16S rRNA sequencing	fastq	M4_NT_Ctrl_J5_R1.fastq	M4_NT_Ctrl_J5_R2.fastq
SRR21748144	SRP324193	new	PRJNA736535	SAMN31027701	M4_NT_Ctrl_J6	Control_D6	AMPLICON	METAGENOMIC	RT-PCR	paired	ILLUMINA	Illumina HiSeq 2500	V4 region 16S rRNA sequencing	fastq	M4_NT_Ctrl_J6_R1.fastq	M4_NT_Ctrl_J6_R2.fastq
SRR21748141	SRP324193	new	PRJNA736535	SAMN31027702	M4_NT_Ctrl_J7	Control_D7	AMPLICON	METAGENOMIC	RT-PCR	paired	ILLUMINA	Illumina HiSeq 2500	V4 region 16S rRNA sequencing	fastq	M4_NT_Ctrl_J7_R1.fastq	M4_NT_Ctrl_J7_R2.fastq
SRR21748140	SRP324193	new	PRJNA736535	SAMN31027703	M4_NT_Ctrl_J8	Control_D8	AMPLICON	METAGENOMIC	RT-PCR	paired	ILLUMINA	Illumina HiSeq 2500	V4 region 16S rRNA sequencing	fastq	M4_NT_Ctrl_J8_R1.fastq	M4_NT_Ctrl_J8_R2.fastq
SRR21748139	SRP324193	new	PRJNA736535	SAMN31027704	M4_NT_Ctrl_J9	Control_D9	AMPLICON	METAGENOMIC	RT-PCR	paired	ILLUMINA	Illumina HiSeq 2500	V4 region 16S rRNA sequencing	fastq	M4_NT_Ctrl_J9_R1.fastq	M4_NT_Ctrl_J9_R2.fastq
SRR21748198	SRP324193	new	PRJNA736535	SAMN31027705	M4_NTA0_W_J1_A	With_antibiotic_D1_A	AMPLICON	METAGENOMIC	RT-PCR	paired	ILLUMINA	Illumina HiSeq 2500	V4 region 16S rRNA sequencing	fastq	M4_NTA0_W_J1_A_R1.fastq	M4_NTA0_W_J1_A_R2.fastq
SRR21748197	SRP324193	new	PRJNA736535	SAMN31027706	M4_NTA0_W_J1_B	With_antibiotic_D1_B	AMPLICON	METAGENOMIC	RT-PCR	paired	ILLUMINA	Illumina HiSeq 2500	V4 region 16S rRNA sequencing	fastq	M4_NTA0_W_J1_B_R1.fastq	M4_NTA0_W_J1_B_R2.fastq
SRR21748196	SRP324193	new	PRJNA736535	SAMN31027707	M4_NTA0_W_J1_C	With_antibiotic_D1_C	AMPLICON	METAGENOMIC	RT-PCR	paired	ILLUMINA	Illumina HiSeq 2500	V4 region 16S rRNA sequencing	fastq	M4_NTA0_W_J1_C_R1.fastq	M4_NTA0_W_J1_C_R2.fastq
SRR21748195	SRP324193	new	PRJNA736535	SAMN31027708	M4_NTA0_W_J2_A	With_antibiotic_D2_A	AMPLICON	METAGENOMIC	RT-PCR	paired	ILLUMINA	Illumina HiSeq 2500	V4 region 16S rRNA sequencing	fastq	M4_NTA0_W_J2_A_R1.fastq	M4_NTA0_W_J2_A_R2.fastq
SRR21748194	SRP324193	new	PRJNA736535	SAMN31027709	M4_NTA0_W_J2_B	With_antibiotic_D2_B	AMPLICON	METAGENOMIC	RT-PCR	paired	ILLUMINA	Illumina HiSeq 2500	V4 region 16S rRNA sequencing	fastq	M4_NTA0_W_J2_B_R1.fastq	M4_NTA0_W_J2_B_R2.fastq
SRR21748193	SRP324193	new	PRJNA736535	SAMN31027710	M4_NTA0_W_J2_C	With_antibiotic_D2_C	AMPLICON	METAGENOMIC	RT-PCR	paired	ILLUMINA	Illumina HiSeq 2500	V4 region 16S rRNA sequencing	fastq	M4_NTA0_W_J2_C_R1.fastq	M4_NTA0_W_J2_C_R2.fastq
SRR21748192	SRP324193	new	PRJNA736535	SAMN31027711	M4_NTA0_W_J3_A	With_antibiotic_D3_A	AMPLICON	METAGENOMIC	RT-PCR	paired	ILLUMINA	Illumina HiSeq 2500	V4 region 16S rRNA sequencing	fastq	M4_NTA0_W_J3_A_R1.fastq	M4_NTA0_W_J3_A_R2.fastq
SRR21748191	SRP324193	new	PRJNA736535	SAMN31027712	M4_NTA0_W_J3_B	With_antibiotic_D3_B	AMPLICON	METAGENOMIC	RT-PCR	paired	ILLUMINA	Illumina HiSeq 2500	V4 region 16S rRNA sequencing	fastq	M4_NTA0_W_J3_B_R1.fastq	M4_NTA0_W_J3_B_R2.fastq
SRR21748190	SRP324193	new	PRJNA736535	SAMN31027713	M4_NTA0_W_J3_C	With_antibiotic_D3_C	AMPLICON	METAGENOMIC	RT-PCR	paired	ILLUMINA	Illumina HiSeq 2500	V4 region 16S rRNA sequencing	fastq	M4_NTA0_W_J3_C_R1.fastq	M4_NTA0_W_J3_C_R2.fastq
SRR21748189	SRP324193	new	PRJNA736535	SAMN31027714	M4_NTA0_W_J4_A	With_antibiotic_D4_A	AMPLICON	METAGENOMIC	RT-PCR	paired	ILLUMINA	Illumina HiSeq 2500	V4 region 16S rRNA sequencing	fastq	M4_NTA0_W_J4_A_R1.fastq	M4_NTA0_W_J4_A_R2.fastq
SRR21748187	SRP324193	new	PRJNA736535	SAMN31027715	M4_NTA0_W_J4_B	With_antibiotic_D4_B	AMPLICON	METAGENOMIC	RT-PCR	paired	ILLUMINA	Illumina HiSeq 2500	V4 region 16S rRNA sequencing	fastq	M4_NTA0_W_J4_B_R1.fastq	M4_NTA0_W_J4_B_R2.fastq
SRR21748186	SRP324193	new	PRJNA736535	SAMN31027716	M4_NTA0_W_J4_C	With_antibiotic_D4_C	AMPLICON	METAGENOMIC	RT-PCR	paired	ILLUMINA	Illumina HiSeq 2500	V4 region 16S rRNA sequencing	fastq	M4_NTA0_W_J4_C_R1.fastq	M4_NTA0_W_J4_C_R2.fastq
SRR21748185	SRP324193	new	PRJNA736535	SAMN31027717	M4_NTA0_W_J5_A	With_antibiotic_D5_A	AMPLICON	METAGENOMIC	RT-PCR	paired	ILLUMINA	Illumina HiSeq 2500	V4 region 16S rRNA sequencing	fastq	M4_NTA0_W_J5_A_R1.fastq	M4_NTA0_W_J5_A_R2.fastq
SRR21748184	SRP324193	new	PRJNA736535	SAMN31027718	M4_NTA0_W_J5_B	With_antibiotic_D5_B	AMPLICON	METAGENOMIC	RT-PCR	paired	ILLUMINA	Illumina HiSeq 2500	V4 region 16S rRNA sequencing	fastq	M4_NTA0_W_J5_B_R1.fastq	M4_NTA0_W_J5_B_R2.fastq
SRR21748183	SRP324193	new	PRJNA736535	SAMN31027719	M4_NTA0_W_J5_C	With_antibiotic_D5_C	AMPLICON	METAGENOMIC	RT-PCR	paired	ILLUMINA	Illumina HiSeq 2500	V4 region 16S rRNA sequencing	fastq	M4_NTA0_W_J5_C_R1.fastq	M4_NTA0_W_J5_C_R2.fastq
SRR21748182	SRP324193	new	PRJNA736535	SAMN31027720	M4_NTA0_W_J6_A	With_antibiotic_D6_A	AMPLICON	METAGENOMIC	RT-PCR	paired	ILLUMINA	Illumina HiSeq 2500	V4 region 16S rRNA sequencing	fastq	M4_NTA0_W_J6_A_R1.fastq	M4_NTA0_W_J6_A_R2.fastq
SRR21748181	SRP324193	new	PRJNA736535	SAMN31027721	M4_NTA0_W_J6_B	With_antibiotic_D6_B	AMPLICON	METAGENOMIC	RT-PCR	paired	ILLUMINA	Illumina HiSeq 2500	V4 region 16S rRNA sequencing	fastq	M4_NTA0_W_J6_B_R1.fastq	M4_NTA0_W_J6_B_R2.fastq
SRR21748180	SRP324193	new	PRJNA736535	SAMN31027722	M4_NTA0_W_J6_C	With_antibiotic_D6_C	AMPLICON	METAGENOMIC	RT-PCR	paired	ILLUMINA	Illumina HiSeq 2500	V4 region 16S rRNA sequencing	fastq	M4_NTA0_W_J6_C_R1.fastq	M4_NTA0_W_J6_C_R2.fastq
SRR21748179	SRP324193	new	PRJNA736535	SAMN31027723	M4_NTA0_W_J7_A	With_antibiotic_D7_A	AMPLICON	METAGENOMIC	RT-PCR	paired	ILLUMINA	Illumina HiSeq 2500	V4 region 16S rRNA sequencing	fastq	M4_NTA0_W_J7_A_R1.fastq	M4_NTA0_W_J7_A_R2.fastq
SRR21748178	SRP324193	new	PRJNA736535	SAMN31027724	M4_NTA0_W_J7_B	With_antibiotic_D7_B	AMPLICON	METAGENOMIC	RT-PCR	paired	ILLUMINA	Illumina HiSeq 2500	V4 region 16S rRNA sequencing	fastq	M4_NTA0_W_J7_B_R1.fastq	M4_NTA0_W_J7_B_R2.fastq
SRR21748176	SRP324193	new	PRJNA736535	SAMN31027725	M4_NTA0_W_J7_C	With_antibiotic_D7_C	AMPLICON	METAGENOMIC	RT-PCR	paired	ILLUMINA	Illumina HiSeq 2500	V4 region 16S rRNA sequencing	fastq	M4_NTA0_W_J7_C_R1.fastq	M4_NTA0_W_J7_C_R2.fastq
SRR21748175	SRP324193	new	PRJNA736535	SAMN31027726	M4_NTA0_W_J8_A	With_antibiotic_D8_A	AMPLICON	METAGENOMIC	RT-PCR	paired	ILLUMINA	Illumina HiSeq 2500	V4 region 16S rRNA sequencing	fastq	M4_NTA0_W_J8_A_R1.fastq	M4_NTA0_W_J8_A_R2.fastq
SRR21748174	SRP324193	new	PRJNA736535	SAMN31027727	M4_NTA0_W_J8_B	With_antibiotic_D8_B	AMPLICON	METAGENOMIC	RT-PCR	paired	ILLUMINA	Illumina HiSeq 2500	V4 region 16S rRNA sequencing	fastq	M4_NTA0_W_J8_B_R1.fastq	M4_NTA0_W_J8_B_R2.fastq
SRR21748173	SRP324193	new	PRJNA736535	SAMN31027728	M4_NTA0_W_J8_C	With_antibiotic_D8_C	AMPLICON	METAGENOMIC	RT-PCR	paired	ILLUMINA	Illumina HiSeq 2500	V4 region 16S rRNA sequencing	fastq	M4_NTA0_W_J8_C_R1.fastq	M4_NTA0_W_J8_C_R2.fastq
SRR21748172	SRP324193	new	PRJNA736535	SAMN31027729	M4_NTA0_W_J9_A	With_antibiotic_D9_A	AMPLICON	METAGENOMIC	RT-PCR	paired	ILLUMINA	Illumina HiSeq 2500	V4 region 16S rRNA sequencing	fastq	M4_NTA0_W_J9_A_R1.fastq	M4_NTA0_W_J9_A_R2.fastq
SRR21748171	SRP324193	new	PRJNA736535	SAMN31027730	M4_NTA0_W_J9_B	With_antibiotic_D9_B	AMPLICON	METAGENOMIC	RT-PCR	paired	ILLUMINA	Illumina HiSeq 2500	V4 region 16S rRNA sequencing	fastq	M4_NTA0_W_J9_B_R1.fastq	M4_NTA0_W_J9_B_R2.fastq
SRR21748170	SRP324193	new	PRJNA736535	SAMN31027731	M4_NTA0_W_J9_C	With_antibiotic_D9_C	AMPLICON	METAGENOMIC	RT-PCR	paired	ILLUMINA	Illumina HiSeq 2500	V4 region 16S rRNA sequencing	fastq	M4_NTA0_W_J9_C_R1.fastq	M4_NTA0_W_J9_C_R2.fastq
SRR21748169	SRP324193	new	PRJNA736535	SAMN31027732	M4_NTSA_W_J1_A	Without_antibiotic_D1_A	AMPLICON	METAGENOMIC	RT-PCR	paired	ILLUMINA	Illumina HiSeq 2500	V4 region 16S rRNA sequencing	fastq	M4_NTSA_W_J1_A_R1.fastq	M4_NTSA_W_J1_A_R2.fastq
SRR21748168	SRP324193	new	PRJNA736535	SAMN31027733	M4_NTSA_W_J1_B	Without_antibiotic_D1_B	AMPLICON	METAGENOMIC	RT-PCR	paired	ILLUMINA	Illumina HiSeq 2500	V4 region 16S rRNA sequencing	fastq	M4_NTSA_W_J1_B_R1.fastq	M4_NTSA_W_J1_B_R2.fastq
SRR21748167	SRP324193	new	PRJNA736535	SAMN31027734	M4_NTSA_W_J1_C	Without_antibiotic_D1_C	AMPLICON	METAGENOMIC	RT-PCR	paired	ILLUMINA	Illumina HiSeq 2500	V4 region 16S rRNA sequencing	fastq	M4_NTSA_W_J1_C_R1.fastq	M4_NTSA_W_J1_C_R2.fastq
SRR21748165	SRP324193	new	PRJNA736535	SAMN31027735	M4_NTSA_W_J2_A	Without_antibiotic_D2_A	AMPLICON	METAGENOMIC	RT-PCR	paired	ILLUMINA	Illumina HiSeq 2500	V4 region 16S rRNA sequencing	fastq	M4_NTSA_W_J2_A_R1.fastq	M4_NTSA_W_J2_A_R2.fastq
SRR21748164	SRP324193	new	PRJNA736535	SAMN31027736	M4_NTSA_W_J2_B	Without_antibiotic_D2_B	AMPLICON	METAGENOMIC	RT-PCR	paired	ILLUMINA	Illumina HiSeq 2500	V4 region 16S rRNA sequencing	fastq	M4_NTSA_W_J2_B_R1.fastq	M4_NTSA_W_J2_B_R2.fastq
SRR21748163	SRP324193	new	PRJNA736535	SAMN31027737	M4_NTSA_W_J2_C	Without_antibiotic_D2_C	AMPLICON	METAGENOMIC	RT-PCR	paired	ILLUMINA	Illumina HiSeq 2500	V4 region 16S rRNA sequencing	fastq	M4_NTSA_W_J2_C_R1.fastq	M4_NTSA_W_J2_C_R2.fastq
SRR21748162	SRP324193	new	PRJNA736535	SAMN31027738	M4_NTSA_W_J3_A	Without_antibiotic_D3_A	AMPLICON	METAGENOMIC	RT-PCR	paired	ILLUMINA	Illumina HiSeq 2500	V4 region 16S rRNA sequencing	fastq	M4_NTSA_W_J3_A_R1.fastq	M4_NTSA_W_J3_A_R2.fastq
SRR21748161	SRP324193	new	PRJNA736535	SAMN31027739	M4_NTSA_W_J3_B	Without_antibiotic_D3_B	AMPLICON	METAGENOMIC	RT-PCR	paired	ILLUMINA	Illumina HiSeq 2500	V4 region 16S rRNA sequencing	fastq	M4_NTSA_W_J3_B_R1.fastq	M4_NTSA_W_J3_B_R2.fastq
SRR21748160	SRP324193	new	PRJNA736535	SAMN31027740	M4_NTSA_W_J3_C	Without_antibiotic_D3_C	AMPLICON	METAGENOMIC	RT-PCR	paired	ILLUMINA	Illumina HiSeq 2500	V4 region 16S rRNA sequencing	fastq	M4_NTSA_W_J3_C_R1.fastq	M4_NTSA_W_J3_C_R2.fastq
SRR21748159	SRP324193	new	PRJNA736535	SAMN31027741	M4_NTSA_W_J4_A	Without_antibiotic_D4_A	AMPLICON	METAGENOMIC	RT-PCR	paired	ILLUMINA	Illumina HiSeq 2500	V4 region 16S rRNA sequencing	fastq	M4_NTSA_W_J4_A_R1.fastq	M4_NTSA_W_J4_A_R2.fastq
SRR21748158	SRP324193	new	PRJNA736535	SAMN31027742	M4_NTSA_W_J4_B	Without_antibiotic_D4_B	AMPLICON	METAGENOMIC	RT-PCR	paired	ILLUMINA	Illumina HiSeq 2500	V4 region 16S rRNA sequencing	fastq	M4_NTSA_W_J4_B_R1.fastq	M4_NTSA_W_J4_B_R2.fastq
SRR21748157	SRP324193	new	PRJNA736535	SAMN31027743	M4_NTSA_W_J4_C	Without_antibiotic_D4_C	AMPLICON	METAGENOMIC	RT-PCR	paired	ILLUMINA	Illumina HiSeq 2500	V4 region 16S rRNA sequencing	fastq	M4_NTSA_W_J4_C_R1.fastq	M4_NTSA_W_J4_C_R2.fastq
SRR21748156	SRP324193	new	PRJNA736535	SAMN31027744	M4_NTSA_W_J5_A	Without_antibiotic_D5_A	AMPLICON	METAGENOMIC	RT-PCR	paired	ILLUMINA	Illumina HiSeq 2500	V4 region 16S rRNA sequencing	fastq	M4_NTSA_W_J5_A_R1.fastq	M4_NTSA_W_J5_A_R2.fastq
SRR21748154	SRP324193	new	PRJNA736535	SAMN31027745	M4_NTSA_W_J5_B	Without_antibiotic_D5_B	AMPLICON	METAGENOMIC	RT-PCR	paired	ILLUMINA	Illumina HiSeq 2500	V4 region 16S rRNA sequencing	fastq	M4_NTSA_W_J5_B_R1.fastq	M4_NTSA_W_J5_B_R2.fastq
SRR21748153	SRP324193	new	PRJNA736535	SAMN31027746	M4_NTSA_W_J5_C	Without_antibiotic_D5_C	AMPLICON	METAGENOMIC	RT-PCR	paired	ILLUMINA	Illumina HiSeq 2500	V4 region 16S rRNA sequencing	fastq	M4_NTSA_W_J5_C_R1.fastq	M4_NTSA_W_J5_C_R2.fastq
SRR21748152	SRP324193	new	PRJNA736535	SAMN31027747	M4_NTSA_W_J6_A	Without_antibiotic_D6_A	AMPLICON	METAGENOMIC	RT-PCR	paired	ILLUMINA	Illumina HiSeq 2500	V4 region 16S rRNA sequencing	fastq	M4_NTSA_W_J6_A_R1.fastq	M4_NTSA_W_J6_A_R2.fastq
SRR21748151	SRP324193	new	PRJNA736535	SAMN31027748	M4_NTSA_W_J6_B	Without_antibiotic_D6_B	AMPLICON	METAGENOMIC	RT-PCR	paired	ILLUMINA	Illumina HiSeq 2500	V4 region 16S rRNA sequencing	fastq	M4_NTSA_W_J6_B_R1.fastq	M4_NTSA_W_J6_B_R2.fastq
SRR21748150	SRP324193	new	PRJNA736535	SAMN31027749	M4_NTSA_W_J6_C	Without_antibiotic_D6_C	AMPLICON	METAGENOMIC	RT-PCR	paired	ILLUMINA	Illumina HiSeq 2500	V4 region 16S rRNA sequencing	fastq	M4_NTSA_W_J6_C_R1.fastq	M4_NTSA_W_J6_C_R2.fastq
SRR21748149	SRP324193	new	PRJNA736535	SAMN31027750	M4_NTSA_W_J7_A	Without_antibiotic_D7_A	AMPLICON	METAGENOMIC	RT-PCR	paired	ILLUMINA	Illumina HiSeq 2500	V4 region 16S rRNA sequencing	fastq	M4_NTSA_W_J7_A_R1.fastq	M4_NTSA_W_J7_A_R2.fastq
SRR21748148	SRP324193	new	PRJNA736535	SAMN31027751	M4_NTSA_W_J7_B	Without_antibiotic_D7_B	AMPLICON	METAGENOMIC	RT-PCR	paired	ILLUMINA	Illumina HiSeq 2500	V4 region 16S rRNA sequencing	fastq	M4_NTSA_W_J7_B_R1.fastq	M4_NTSA_W_J7_B_R2.fastq
SRR21748147	SRP324193	new	PRJNA736535	SAMN31027752	M4_NTSA_W_J7_C	Without_antibiotic_D7_C	AMPLICON	METAGENOMIC	RT-PCR	paired	ILLUMINA	Illumina HiSeq 2500	V4 region 16S rRNA sequencing	fastq	M4_NTSA_W_J7_C_R1.fastq	M4_NTSA_W_J7_C_R2.fastq
SRR21748146	SRP324193	new	PRJNA736535	SAMN31027753	M4_NTSA_W_J8_A	Without_antibiotic_D8_A	AMPLICON	METAGENOMIC	RT-PCR	paired	ILLUMINA	Illumina HiSeq 2500	V4 region 16S rRNA sequencing	fastq	M4_NTSA_W_J8_A_R1.fastq	M4_NTSA_W_J8_A_R2.fastq
SRR21748145	SRP324193	new	PRJNA736535	SAMN31027754	M4_NTSA_W_J8_B	Without_antibiotic_D8_B	AMPLICON	METAGENOMIC	RT-PCR	paired	ILLUMINA	Illumina HiSeq 2500	V4 region 16S rRNA sequencing	fastq	M4_NTSA_W_J8_B_R1.fastq	M4_NTSA_W_J8_B_R2.fastq
SRR21748143	SRP324193	new	PRJNA736535	SAMN31027755	M4_NTSA_W_J8_C	Without_antibiotic_D8_C	AMPLICON	METAGENOMIC	RT-PCR	paired	ILLUMINA	Illumina HiSeq 2500	V4 region 16S rRNA sequencing	fastq	M4_NTSA_W_J8_C_R1.fastq	M4_NTSA_W_J8_C_R2.fastq
SRR21748142	SRP324193	new	PRJNA736535	SAMN31027756	M4_ResNT	ResII	AMPLICON	METAGENOMIC	RT-PCR	paired	ILLUMINA	Illumina HiSeq 2500	V4 region 16S rRNA sequencing	fastq	M4_ResNT_R1.fastq	M4_ResNT_R2.fastq
